# Supplementary material for: Chemotropic signaling by BMP7 requires selective interaction at a key residue in ActRIIA
Source: PubMed Central journal article supplement (PMC6679395; doi:10.1242/bio.042283), 2019-06-17
Supplement: biolopen-8-042283-s1.pdf [file biolopen-8-042283-s1.pdf]

**Table S1. Antibodies and dilutions used in this study.**

| <b>Antibody</b>                      | <b>Source</b>               | <b>Catalog #</b>             | <b>Lot #</b> | <b>Dilution</b> |
|--------------------------------------|-----------------------------|------------------------------|--------------|-----------------|
| <b>Primary Antibodies</b>            |                             |                              |              |                 |
| pan-ERM (IgM)                        | Gift from F. Solomon (MIT)  | Hybridoma supernatant (13H9) |              | 1:200           |
| GFP                                  | Molecular Probes            | A11122                       | 1828014      | 1:1000          |
| ACTR-II (H-65)                       | Santa Cruz Biotechnology    | sc-25451                     | B2009        | 1:2000          |
| GAPDH                                | Abcam                       | ab9485                       | 808033       | 1:1000          |
| Phospho-Smad1/5/9                    | Cell Signaling Technology   | 13820                        | 3            | 1:4000          |
| Smad1                                | Cell Signaling Technology   | 6944                         | 5            | 1:4000          |
| Phospho-Akt                          | Cell Signaling Technology   | 4060                         | 23           | 1:8000          |
| Akt (pan)                            | Cell Signaling Technology   | 4691                         | 20           | 1:50,000        |
| <b>Secondary Antibodies</b>          |                             |                              |              |                 |
| HRP-conjugated mouse anti-rabbit IgG | Santa Cruz Biotechnology    | sc-2357                      | I2215        | 1:10,000        |
| Cy2-conjugated goat anti-mouse IgG   | Jackson ImmunoResearch Labs | 115-225-146                  | 133889       | 1:200           |
| Cy3-conjugated goat anti-rabbit IgG  | Jackson ImmunoResearch Labs | 111-165-144                  | 134845       | 1:500           |
| Cy3-conjugated goat anti-mouse IgM   | Jackson ImmunoResearch Labs | 115-165-075                  | 115625       | 1:500           |

**Figure S1. GFP expression is detected in transfected DSC neurons.** Western blots of untransfected, whole cell DSC lysates and dsRed<sup>A</sup>DSC lysates were probed with anti-ActRIIA and anti-GFP antibodies demonstrating expression of GFP in transfected neurons only. Detection of GAPDH provided a loading control.

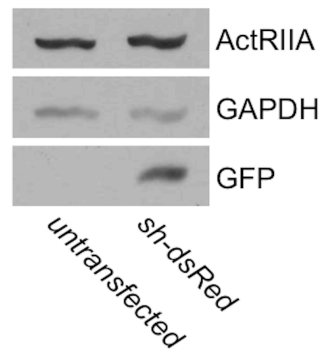

**Figure S2. Knockdown of ActRIIA does not effect the expression of the remaining type II BMP receptors, ActRIIB and BMPR2.** Western blots of dsRed<sup>Δ</sup>DSC and AIIA<sup>Δ</sup>DSC whole cell lysates were probed with anti-ActRIIA, anti-ActRIIB and anti-BMPR2 antibodies demonstrating selective loss of ActRIIA expression in the presence of *sh-AIIA*. Detection of GAPDH provided a loading control. This analysis also confirms that all three type II BMP receptors are expressed in DSC neurons.

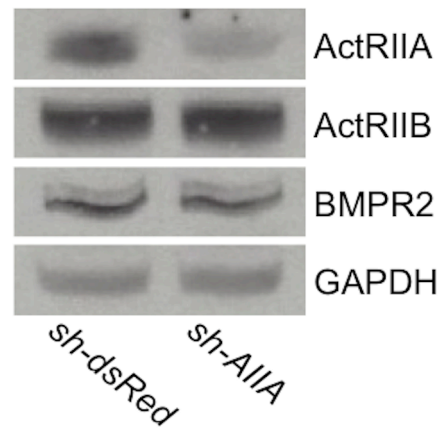

**Figure S3. Amino acid sequence alignment of mouse ActRIIA and mouse ActRIIB.**

The amino acid sequences for mouse ActRIIA (NCBI accession # NP\_031422.3) and mouse ActRIIB (NCBI accession # NP\_031423.1) were aligned using the NCBI BLAST Multiple Alignment tool. The *Lys* and *Glu* mutated in ActRIIA and ActRIIB, respectively, are highlighted in yellow and the *Val* residues mutated in ActRIIA V3 are highlighted in green. Note that the numbering for the full-length amino acid sequences shown here differs from numbering used throughout the paper, which is derived from the model of BMP7 bound to the ECD of ActRIIA (PDB ID: 1LX5; Greenwald et al., 2003).

|         |     |           |         |       |          |        |         |        |       |         |      |        |     |       |        |      |   |   |   |   |   |      |   |   |   |   |     |     |   |   |   |   |   |   |     |   |   |   |   |   |   |   |   |     |     |     |     |     |     |     |
|---------|-----|-----------|---------|-------|----------|--------|---------|--------|-------|---------|------|--------|-----|-------|--------|------|---|---|---|---|---|------|---|---|---|---|-----|-----|---|---|---|---|---|---|-----|---|---|---|---|---|---|---|---|-----|-----|-----|-----|-----|-----|-----|
| ActRIIA | 1   | MGAAAKLAF | VFLISCS | SGA   | ILGRSETQ | EC     | LFFNANW | ERD    | RTNQ  | TGVEPC  | 50   |        |     |       |        |      |   |   |   |   |   |      |   |   |   |   |     |     |   |   |   |   |   |   |     |   |   |   |   |   |   |   |   |     |     |     |     |     |     |     |
| ActRIIB | 1   | M-TAPWA   | ALA     | LLWGS | L        | CAGS   | GRGEA   | ETREC  | IYYN  | NANWELE | RTNQ | SGLERC | 49  |       |        |      |   |   |   |   |   |      |   |   |   |   |     |     |   |   |   |   |   |   |     |   |   |   |   |   |   |   |   |     |     |     |     |     |     |     |
| ActRIIA | 51  | YGDKDK    | R       | RHC   | FATW     | KNISGS | IEIVK   | QGCWL  | DDIN  | CYDR    | TD   | CIEK   | K   | DSPEV | 100    |      |   |   |   |   |   |      |   |   |   |   |     |     |   |   |   |   |   |   |     |   |   |   |   |   |   |   |   |     |     |     |     |     |     |     |
| ActRIIB | 50  | EGEQDK    | R       | LHC   | YASW     | RNSSGT | IELV    | KKGCWL | DDFN  | CYDR    | QE   | CVAT   | E   | ENPQV | 99     |      |   |   |   |   |   |      |   |   |   |   |     |     |   |   |   |   |   |   |     |   |   |   |   |   |   |   |   |     |     |     |     |     |     |     |
| ActRIIA | 101 | YFCCCE    | G       | NMC   | NEKF     | SYPPEM | EVTQ    | PTSNPV | TPK   | PPY     | NIL  | LYSL   | V   | PLMLI | 150    |      |   |   |   |   |   |      |   |   |   |   |     |     |   |   |   |   |   |   |     |   |   |   |   |   |   |   |   |     |     |     |     |     |     |     |
| ActRIIB | 100 | YFCCCE    | G       | NFC   | NERF     | THLPEP | GGPE    | VTYEPP | PTAP  | TLL     | TVL  | AYSL   | L   | PIGGL | 149    |      |   |   |   |   |   |      |   |   |   |   |     |     |   |   |   |   |   |   |     |   |   |   |   |   |   |   |   |     |     |     |     |     |     |     |
| ActRIIA | 151 | AGIVIC    | A       | FWV   | YRHH     | KMAYPP | VLV     | -----  | ----- | -----   | PTQD | 177    |     |       |        |      |   |   |   |   |   |      |   |   |   |   |     |     |   |   |   |   |   |   |     |   |   |   |   |   |   |   |   |     |     |     |     |     |     |     |
| ActRIIB | 150 | SLIVLL    | A       | FWM   | YRHR     | KPPYGH | VDI     | HEVR   | QCQ   | RWAG    | RRD  | GCA    | DSF | K     | PLPFQD | 199  |   |   |   |   |   |      |   |   |   |   |     |     |   |   |   |   |   |   |     |   |   |   |   |   |   |   |   |     |     |     |     |     |     |     |
| ActRIIA | 178 | PGPPPP    | S       | PLL   | GLK      | PLQ    | L       | LEV    | KARG  | R       | F    | G      | C   | V     | W      | KAQL | L | N | E | Y | V | VKIF | P | I | Q | D | 227 |     |   |   |   |   |   |   |     |   |   |   |   |   |   |   |   |     |     |     |     |     |     |     |
| ActRIIB | 200 | PGPPPP    | S       | PLV   | GLK      | PLQ    | L       | EI     | KARG  | R       | F    | G      | C   | V     | W      | KAQL | M | N | D | F | V | VKIF | P | L | Q | D | Q   | 249 |   |   |   |   |   |   |     |   |   |   |   |   |   |   |   |     |     |     |     |     |     |     |
| ActRIIA | 228 | SWQNE     | E       | Y     | E        | V      | Y       | S      | L     | P       | G    | M      | K   | H     | E      | N    | I | L | Q | F | I | G    | A | E | K | R | G   | T   | S | V | D | V | L | W | L   | I | T | A | F | H | E | K | G | S   | L   | S   | D   | 277 |     |     |
| ActRIIB | 250 | SWQSE     | R       | E     | I        | F      | S       | T      | P     | G       | M    | K      | H   | E     | N      | L    | L | Q | F | I | A | A    | E | K | R | G | S   | N   | L | E | V | E | L | W | L   | I | T | A | F | H | D | K | G | S   | L   | T   | D   | 299 |     |     |
| ActRIIA | 278 | FLKAN     | V       | V     | S        | W      | N       | ELCH   | I     | A       | E    | T      | M   | A     | R      | G    | L | A | L | H | E | D    | I | P | G | L | K   | -   | D | G | H | K | P | A | I   | S | H | R | D | I | K | S | K | 326 |     |     |     |     |     |     |
| ActRIIB | 300 | YLKGN     | I       | I     | T        | W      | N       | ELCH   | V     | A       | E    | T      | M   | S     | R      | G    | L | S | Y | L | H | E    | D | V | P | W | C   | R   | G | E | G | H | K | P | S   | I | A | H | R | D | F | K | S | K   | 349 |     |     |     |     |     |
| ActRIIA | 327 | NVLLK     | N       | N     | L        | T      | A       | C      | I     | A       | D    | F      | L   | A     | L      | K    | F | E | A | G | S | A    | G | D | T | H | G   | Q   | V | G | T | R | R | Y | M   | A | P | E | V | L | E | G | A | I   | N   | 376 |     |     |     |     |
| ActRIIB | 350 | NVLLK     | S       | D     | L        | T      | A       | V      | L     | A       | D    | F      | L   | A     | V      | R    | F | E | P | G | K | P    | P | G | D | T | H   | G   | Q | V | G | T | R | R | Y   | M | A | P | E | V | L | E | G | A   | I   | N   | 399 |     |     |     |
| ActRIIA | 377 | FQDA      | F       | L     | R        | I      | D       | M      | Y     | A       | M    | G      | L   | V     | L      | W    | E | L | A | S | R | C    | T | A | A | D | G   | P   | V | D | E | Y | M | L | P   | F | E | E | I | G | Q | H | P | S   | L   | E   | 426 |     |     |     |
| ActRIIB | 400 | FQDA      | F       | L     | R        | I      | D       | M      | Y     | A       | M    | G      | L   | V     | L      | W    | E | L | V | S | R | C    | K | A | A | D | G   | P   | V | D | E | Y | M | L | P   | F | E | E | I | G | Q | H | P | S   | L   | E   | 449 |     |     |     |
| ActRIIA | 427 | DMQE      | V       | V     | V        | H      | K       | K      | K     | R       | P    | V      | L   | R     | D      | Y    | W | Q | K | H | A | G    | M | A | M | L | C   | E   | T | I | E | E | C | W | D   | H | D | A | E | A | R | L | S | A   | G   | C   | V   | G   | 476 |     |
| ActRIIB | 450 | ELQE      | V       | V     | V        | H      | K       | K      | K     | M       | R    | P      | T   | I     | K      | D    | H | W | L | K | H | P    | G | L | A | Q | L   | C   | V | T | I | E | E | C | W   | D | H | D | A | E | A | R | L | S   | A   | G   | C   | V   | E   | 499 |
| ActRIIA | 477 | ERITQ     | M       | Q     | R        | L      | T       | N      | I     | I       | T    | T      | E   | D     | I      | V    | T | V | V | T | M | V    | T | N | V | D | F   | P   | P | K | E | S | S | L | 513 |   |   |   |   |   |   |   |   |     |     |     |     |     |     |     |
| ActRIIB | 500 | ERVSL     | I       | R     | R        | S      | V       | N      | G     | T       | T    | S      | D   | C     | L      | V    | S | L | V | T | S | V    | T | N | V | D | L   | L   | P | K | E | S | S | I | 536 |   |   |   |   |   |   |   |   |     |     |     |     |     |     |     |

**Figure S4. Mutation of ActRIIB *Glu*<sup>75</sup> does not rescue BMP7-evoked chemotaxis.**

Chemotaxis in response to 50 ng/mL BMP7 (mean  $\pm$  s.e.m.). Chemotaxis indices for dsRed<sup>Δ</sup>WEHI cells co-expressing ActRIIB (*lane 1*, CI = 41.7  $\pm$  3.9) and ActRIIB E75K (*lane 3*, CI = 19.8  $\pm$  2.2). Chemotaxis indices for AIIA<sup>Δ</sup>WEHI cells co-expressing ActRIIB (*lane 2*, CI = 8.7  $\pm$  11) and ActRIIB E75K (*lane 4*, CI = -16  $\pm$  1.0). In dsRed<sup>Δ</sup>WEHI cells co-expressing ActRIIB, BMP7-evoked chemotaxis differs significantly from chemotaxis in dsRed<sup>Δ</sup>WEHI cells co-expressing ActRIIB E75K (\* $P$  < 0.05,  $n$  = 2) and from chemotaxis in AIIA<sup>Δ</sup>WEHI cells co-expressing ActRIIB E75K (\*\* $P$  < 0.005,  $n$  = 2) (Student's two tailed  $t$ -test).

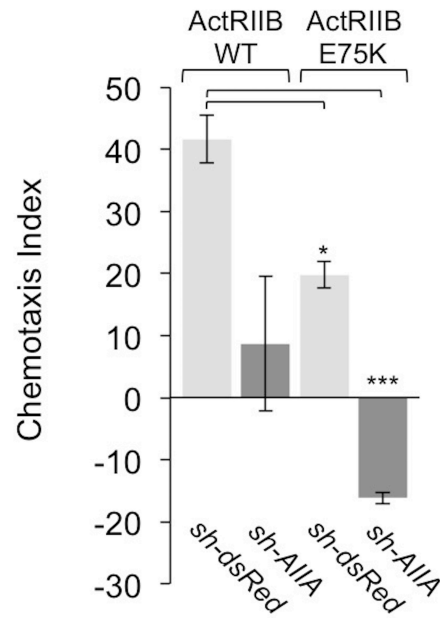

**Figure S5. Loss of ActRIIA and expression of ActRIIA K76A results in unregulated increases in pAkt levels.** All samples are shown with respect to pAkt levels in unstimulated, dsRed<sup>Δ</sup>WEHI lysates expressing ActRIIA V3 (*lane 1*). Significant differences were observed in pAkt levels between unstimulated, dsRed<sup>Δ</sup>WEHI lysates co-expressing ActRIIA V3 and WEHI cells stimulated with BMP7 including AIIA<sup>Δ</sup>WEHI lysates co-expressing ActRIIA V3 (*lanes 1 and 4*, 82% over control), dsRed<sup>Δ</sup>WEHI lysates co-expressing ActRIIA V3 K76A (*lanes 1 and 6*, 87% over control) and AIIA<sup>Δ</sup>WEHI lysates co-expressing ActRIIA V3 K76A (*lanes 1 and 8*, 135% over control) (\**P* < 0.05, Student's two tailed *t*-test). The difference in pAkt levels between dsRed<sup>Δ</sup>WEHI lysates co-expressing ActRIIA V3 (*lane 1*) and AIIA<sup>Δ</sup>WEHI lysates co-expressing ActRIIA V3 K76A (*lane 7*, 144% over control) in the absence of BMP7 is highly significant (\*\*\**P* < 0.0001, Student's two tailed *t*-test). Increases in pAkt levels in the absence of BMP7 stimulation including AIIA<sup>Δ</sup>WEHI lysates co-expressing ActRIIA V3 (*lane 3*, 80% over control) and dsRed<sup>Δ</sup>WEHI lysates co-expressing ActRIIA V3 K76A (*lane 5*, 75% over control) were also observed.

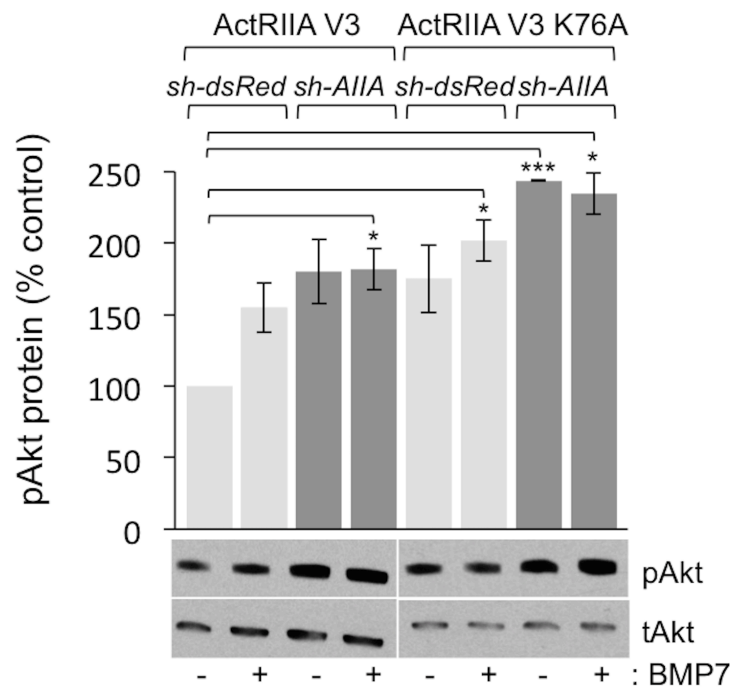

## List of Symbols and Abbreviations

|             |                                     |
|-------------|-------------------------------------|
| ActRIIA     | Activin A receptor type IIA         |
| ActRIIB     | Activin A receptor type IIB         |
| ALK         | Activin receptor-like kinase        |
| BISC        | BMP-induced signaling complex       |
| BMP         | Bone morphogenetic protein          |
| BMPR2       | BMP receptor type 2                 |
| CI          | Chemotaxis index                    |
| DSC         | Dorsal spinal cord                  |
| ECD         | Extracellular domain                |
| EGFP        | Enhanced Green Fluorescent Protein  |
| FACS        | Fluorescence-activated cell sorting |
| GCAD        | Growth cone area decrease           |
| LIMK1       | Lim domain kinase 1                 |
| PDB         | Protein Data Bank                   |
| PI3K        | Phosphoinositide 3-kinase           |
| PFC         | Preformed complex                   |
| RNAi        | RNA interference                    |
| shRNA       | short hairpin RNA                   |
| TBS         | Tris-buffered saline                |
| TGF $\beta$ | Transforming growth factor beta     |
